# Supplementary material
Source: PubMed Central journal article supplement (PMC2872467)
Supplement: 1002620107_pnas.201002620SI.pdf [file 1002620107_pnas.201002620SI.pdf]

# Supporting Information

Rosenberger et al. 10.1073/pnas.1002620107

## SI Text

**DNA Staining and Flow Cytometry Analysis.** Cells were harvested by trypsination, washed twice with PBS, and fixed with 70% ethanol. After fixation and centrifugation, the cell pellet was resuspended in the DNA staining solution containing DAPI as the DNA dye and SR101 as a protein counterstain following a protocol published by Stöhr et al. (1).

**Immunofluorescence.** Keratinocytes were grown on coverslips in K-SFM, with and without EGF depletion for 24 h, or in DMEM.

After rinsing with PBS, cells were fixed in 4% paraformaldehyde for 15 min at room temperature and permeabilized with 0.1% Nonidet P-40 for 5 min. Primary antibodies (anti-keratin GP-CK10 and GP-CK18; both from PROGEN) were applied overnight. After rinsing in PBS, incubation with secondary antibody (anti-guinea pig coupled to Alexa 488) was done for 2 h at 4 °C. Nuclei were stained with DAPI. Visualization and documentation were performed with a Leica photomicroscope (2).

1. Stöhr M, Vogt-Schaden M, Knobloch M, Vogel R, Futterman G (1978) Evaluation of eight fluorochrome combinations for simultaneous DNA-protein flow analyses. *Stain Technol* 53: 205–215.

2. Langbein L, Spring H, Rogers MA, Praetzel S, Schweizer J (2004) Hair keratins and hair follicle-specific epithelial keratins. *Methods Cell Biol* 78:413–451.

3. Doorbar J (2006) Molecular biology of human papillomavirus infection and cervical cancer. *Clin Sci* 110:525–541.

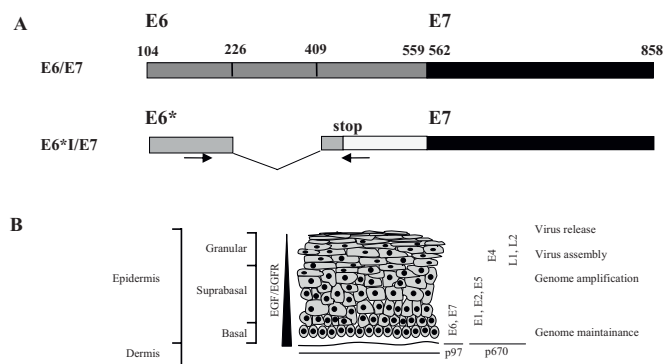

**Fig. S1.** (A) Organization of HPV16 E6/E7 and E6\*/E7 early mRNA; base pair numbers are given relative to HPV genome localization. Exclusion of the exon 226–409 results in formation of the E6\* ORF, which harbors a premature stop-codon. Arrows indicate primer localization for semi-quantitative RT-PCR. (B) Illustration of replicative life cycle and gene expression of mucosal HPV within the epidermis. Modified figure according to ref. 3.



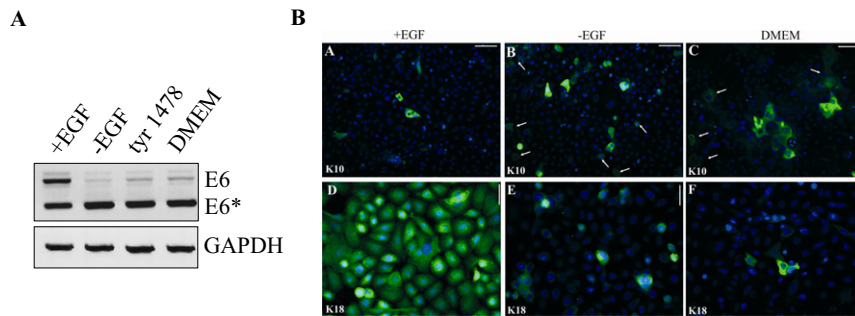

**Fig. 54.** DMEM-induced differentiation is correlated with enhanced E6 exon exclusion. (A) RT-PCR showing cytoplasmic E6 and E6\* mRNA levels obtained from "1321" keratinocytes cultivation in the presence of EGF, tyrphostin 1478, and DMEM/10% serum for 24 h. (-EGF): EGF withdrawal for 24 h. (B) Immunofluorescence of cytokeratin K10 (A–C) and K18 (D–F) in keratinocytes grown in K-SFM medium with EGF (A and D) (+EGF), without EGF (B and E) (-EGF), or in DMEM/10% FCS (C and F). The arrows in B and D indicate cells weaker positive for K10 cytokeratin expression. (Scale bars: 50  $\mu$ m.)

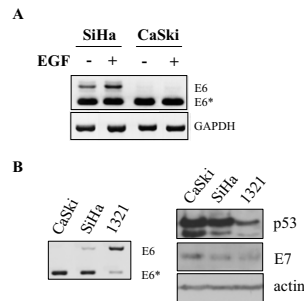

**Fig. 55.** Analysis of E6 splicing pattern in cervical carcinoma cell lines SiHa and CaSki. (A) SiHa and CaSki cells were treated with 5 ng/mL EGF for 24 h where indicated. Cytoplasmic RNA was harvested for RT-PCR analysis. (B Left) Cytoplasmic RNA from SiHa, CaSki, and "1321" keratinocytes were analyzed by RT-PCR. (Right) Western Blot showing the correlating nuclear protein levels of p53 and E7. Protein and RNA was extracted from the same samples.

**Table S1. Primers and experimental conditions used for RT-PCR**

| Primer | Sequence                               | Product length | Annealing temperature | Cycle number |
|--------|----------------------------------------|----------------|-----------------------|--------------|
| E6/E6* | ss 5' actgcaatgtttcaggacc 3'           | 343 bp         | 60°C                  | 35           |
|        | as 5' taggacacagtgctttt 3'             | 161 bp         |                       |              |
| p53    | ss 5' ctgaggttgctctgactgtaccacatcc 3'  | 370 bp         | 53°C                  | 30           |
|        | as 5' ctattcagctctcggacatctcgaagcg 3'  |                |                       |              |
| c-Jun  | ss 5' gcatgaggaaccgcatcgtctcctcaagt 3' | 409 bp         | 55°C                  | 35           |
|        | as 5' gcgaccaagtctcccactcgtgcacact 3'  |                |                       |              |
| GAPDH  | ss 5' tggatattgttccatcaatgacc 3'       | 460 bp         | 65°C                  | 28           |
|        | as 5' gatgcatggactgtggtcatg 3'         |                |                       |              |
